# Supplementary material
Source: PubMed Central journal article supplement (PMC4770794)
Supplement: NIHMS758535-supplement-Supplementary_Appendix_1.pdf [file NIHMS758535-supplement-Supplementary_Appendix_1.pdf]

## Supplementary Appendix 1. MAPP Research Network

### MAPP Research Network Study Group

#### MAPP Network Executive Committee

J. Quentin Clemens, MD, FACS, MSci,  
Network Chair, 2013-  
Philip Hanno, MD  
Ziya Kirkali, MD  
John W. Kusek, PhD  
J. Richard Landis, PhD  
M. Scott Lucia, MD  
Chris Mullins, PhD  
Michel A. Pontari, MD

#### Northwestern University Discovery Site

David J. Klumpp, PhD, Co-Director  
Anthony J. Schaeffer, MD, Co-Director  
Apkar (Vania) Apkarian, PhD  
David Cella, PhD  
Melissa A. Farmer, PhD  
Colleen Fitzgerald, MD  
Richard Gershon, PhD  
James W. Griffith, PhD  
Charles J. Heckman II, PhD  
Mingchen Jiang, PhD  
Laurie Keefer, PhD  
Darlene S. Marko, RN, BSN, CCRP  
Jean Michniewicz  
Todd Parrish, PhD  
Frank Tu, MD, MPH

#### University of California, Los Angeles Discovery Site and PAIN Neuroimaging Core

Emeran A. Mayer, MD, Co-Director  
Larissa V. Rodriguez, MD, Co-Director  
Jeffrey Alger, PhD  
Cody P. Ashe-McNalley  
Ben Ellingson, PhD  
Nuwanthi Heendeniya  
Lisa Kilpatrick, PhD  
Jason Kutch, PhD  
Jennifer S. Labus, PhD  
Bruce D. Naliboff, PhD  
Fornessa Randal  
Suzanne R. Smith, RN, NP

#### University of Iowa Discovery Site

Karl J. Kreder, MD, MBA, Director  
Catherine S. Bradley, MD, MSCE  
Mary Eno, RN, RA II  
Kris Greiner, BA  
Yi Luo, PhD, MD  
Susan K. Lutgendorf, PhD  
Michael A. O'Donnell, MD  
Barbara Ziegler, BA

#### University of Michigan Discovery Site

Daniel J. Clauw, MD, Co-Director,  
Network Chair, 2008-2013  
J. Quentin Clemens, MD, FACS, MSci,  
Co-Director; Network Chair, 2013-  
Suzie As-Sanie, MD  
Sandra Berry, MA  
Megan E. Halvorson, BS, CCRP  
Richard Harris, PhD  
Steve Harte, PhD  
Eric Ichesco, BS  
Ann Oldendorf, MD  
Katherine A. Scott, RN, BSN  
David A. Williams, PhD

#### University of Washington, Seattle Discovery Site

Dedra Buchwald, MD, Director  
Niloofer Afari, PhD, Univ. Of California,  
San Diego  
John Krieger, MD  
Jane Miller, MD  
Stephanie Richey, BS  
Susan O. Ross, RN, MN  
Roberta Spiro, MS  
TJ Sundsvold, MPH  
Eric Strachan, PhD  
Claire C. Yang, MD

#### Washington University, St. Louis Discovery Site

Gerald L. Andriole, MD, Co-Director  
H. Henry Lai, MD, Co-Director  
Rebecca L. Bristol, BA, BS, Coordinator  
Graham Colditz, MD, DrPH  
Georg Deutsch, PhD, Univ. of  
Alabama at Birmingham  
Vivien C. Gardner, RN, BSN, Coordinator  
Robert W. Gereau IV, PhD  
Jeffrey P. Henderson, MD, PhD  
Barry A. Hong, PhD, FAACP  
Thomas M. Hooton, MD, Univ of Miami  
Timothy J. Ness, MD, PhD, Univ. of  
Alabama at Birmingham  
Carol S. North, MD, MPE, Univ.  
Texas Southwestern  
Theresa M. Spitznagle, PT, DPT, WCS  
Siobhan Sutcliffe, PhD, ScM, MHS

#### University of Pennsylvania Data Coordinating Core (DCC)

J. Richard Landis, PhD, Core Director  
Ted Barrell, BA  
Theressa Creighton, BA  
Laura Fluharty, MPH  
Philip Hanno, MD  
Xiaoling Hou, MS  
Michel A. Pontari, MD  
Nancy Robinson, PhD  
Alisa Stephens, PhD  
Yanli Wang, MS

#### University of Colorado Denver Tissue Analysis & Technology Core (TATC)

M. Scott Lucia, MD, Core Director  
Adrie van Bokhoven, PhD  
Andrea A. Osypuk, BS  
Robert Dayton, Jr  
Karen R. Jonscher, PhD  
Holly T. Sullivan, BS  
R. Storey Wilson, MS

#### Additional Sites:

##### Harvard Medical School/ Boston Children's Hospital

Marsha A. Moses, PhD, Director  
Andrew C. Briscoe  
David Briscoe, MD  
Adam Curatolo, BA  
John Froehlich, PhD  
Richard S. Lee, MD  
Monisha Sachdev, BS  
Keith R. Solomon, PhD  
Hanno Steen, PhD

##### Stanford University

Sean Mackey, MD, PhD, Director  
Epifanio Bagarinao, PhD  
Lauren C. Foster, BA  
Emily Hubbard, BA  
Kevin A. Johnson, PhD, RN  
Katherine T. Martucci, PhD  
Rebecca L. McCue, BA  
Rachel R. Moericke, MA  
Aneesha Nilakantan, BA  
Noorulain Noor, BS

##### Queens University

J. Curtis Nickel, MD, FRCSC, Director

##### Drexel University College of Medicine

Garth D. Ehrlich, PhD

##### National Institutes of Diabetes and Digestive and Kidney Diseases (NIDDK), National Institutes of Health (NIH)

Chris Mullins, PhD  
John W. Kusek, PhD  
Ziya Kirkali, MD  
Tamara G. Bavendam, MD
